# Supplementary material for: Regulatory role of MlrA in transcription activation of csgD, the master regulator of biofilm formation in Escherichia coli
Source: Oxford University Press journal article supplement (doi:10.1111/j.1574-6968.2010.02112.x), 2010-09-05
Supplement: FML_2112_sm_suppltables.doc [file FML_2112_sm_suppltables.doc]

**Supplemental Table 1**

*Escherichia coli* strains used

------------------------------------------------------------------------------------------------------------------

Strain Genotype Source

------------------------------------------------------------------------------------------------------------------

BW25113 F- *lac*q *rrnB*3 *lacZ*4787*hsdR* *araBAD* *rhaBAD* *rph*-1

Baba *et al*. (2006)

JW3368 BW25113 *ompR* Baba *et al*. (2006)

JW0230 BW25113 *crl* Baba *et al*. (2006)

JW3883 BW25113 *cpxR* Baba *et al*. (2006)

JW2205 BW25113 *rcsB* Baba *et al*. (2006)

JW1600 BW25113 *rstA* Baba *et al*. (2006)

JW1702 BW25113 *infA* Baba *et al*. (2006)

JW0895 BW25113 *infB* Baba *et al*. (2006)

JW1225 BW25113 *hns* Baba *et al*. (2006)

JW1023 BW25113 *csgD* Baba *et al*. (2006)

JW2115 BW25113 *mlrA* Baba *et al*. (2006)

BWcsgD*JW1023 KmS this study

BWmlrA*JW2115 KmS this study

BWWT*csgD* BW25113 *csgD*-*lacZ* this study

BWcsgD*csgD* BWcsgD *csgD*-*lacZ* this study

BWmlrA*dppB* BWmlrA *dppB-lacZ* this study

BL21(DE3) F- *ompT* *hsd* (rB- mB-) *dcm* *gal* l(DE3)

MC4100 F- *araD*, Δ(*argF-lac*) *rpsL* *relA* *thiA* *deoC ptsF flbB tonA*

---------------------------------------------------------------------------------------------------------------------

* Km marker was eliminated using pCP20.

**Supplemental Table 2**

Primers used in this study

------------------------------------------------------------------------------------------------------------------

Primer Sequence (5’ to 3’)

------------------------------------------------------------------------------------------------------------------

mlrA-EcoRI-BADF AAACTACCGAATTCGCAAAACTGCGTCTAA

mlrA-XbaI-BADR CTTATGTTCTAGAAAGGATTGTACAGTAAA

ycgE-EcoRI-BADF GTACAAAGAATTCTTGGGTCGTGTACA

ycgE-XbaI-BADR TTGTGGGTCTAGATTATAACATTCTGTCTA

csgD-EcoRI-F AGACAGGAATTCTTCTTGCCCGTCGCT

csgD-BamHI-R2 CTGACAGGATCCTCTAAAATAGAAGCACCA

csgB-EcoRI-F TTTAAGAATTCATACAAATGGTGATAACTT

csgB-BamHI-R CCCAGGCGGATCCAGTATTGTTAACATCAT

dppB-EcoRI-F GCAAACATGAATTCGAAAACGTCTCTATCGAA

dppB-BamHI-R GGGATGACGGATCCCAAACGTCGGAGAATA

csgD-F TTCTTGCCCGTCGCTGATTGCT

csgD-FITC-R GCACTGCTGTGTGTAGTAAT

csgB-S1F GAATGACTGTCTGGTGCTTTTTGATAG

csgB-FITC-R GTTTTTCATGTTGTCACCCTGGACCTGGTC

------------------------------------------------------------------------------------------------------------------
